# Supplementary material
Source: PubMed Central journal article supplement (PMC3892304)
Supplement: pro0023-0110-SD1.pdf [file pro0023-0110-SD1.pdf]

# Supplementary material

## 1. Theory Introduction

TK-SA system treating the protein folding as a chemical reaction, utilization TK-SA model, the reaction thermodynamics and the partition function to calculate the reaction Gibbs free energy  $\Delta G_{qq}$  caused by the charge distribution to measure the effect of surface charge distribution on the protein stability. If the value of  $\Delta G_{qq}$  is positive, the distribution of surface charge plays a negative role on the protein overall stability; otherwise it plays a positive role<sup>1-18</sup>.

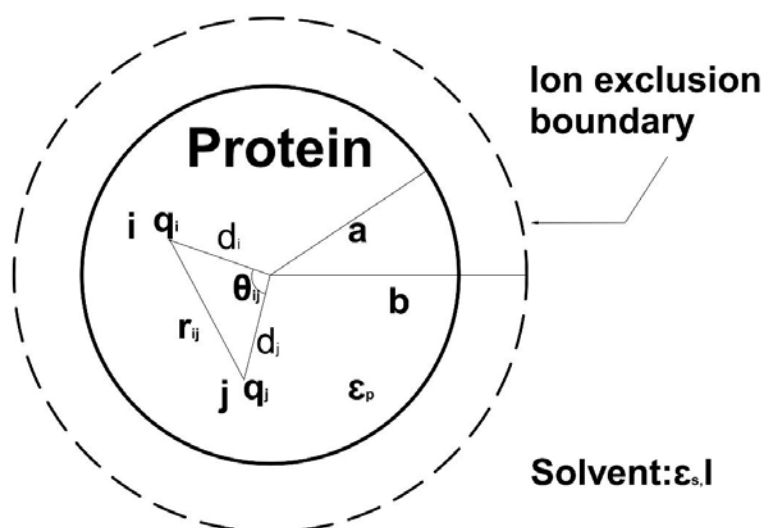

**Figure S1. Diagrammatic sketch of TK model.**  $a$  is the radius of the protein,  $b$  is the extent radius,  $i$  and  $j$  represent two chargeable residues,  $q_i$  and  $q_j$  are charge number when they are protonated,  $r_{ij}$  is the distance between point  $i$  and  $j$ ,  $\epsilon_p$  is the dielectric constant of protein,  $\epsilon_s$  is the dielectric constant of solution,  $I$  ionic strength of the solution.  $d_i$  and  $d_j$  is the distance between the center of the protein and the position of  $i$  or  $j$ .

In TK-SA model, the interaction energies between the surface charges of point  $i$  and  $j$  are

calculated as:

$$E_{ij} = \varepsilon^2 \left( \frac{A_{ij} - B_{ij}}{2b} - \frac{C_{ij}}{2a} \right) (1 - SA_{ij}) \quad (\text{Eq.1})$$

Where  $b$  is the radius of the sphere representing the protein,  $a$  is the radius of the sphere from which solvent ions are excluded, calculated as :

$$a = b + 1.4 \quad (\text{Eq.2})$$

$SA_{ij}$  is the average solvent accessibility of group  $i$  and calculated as:

$$SA_{ij} = \frac{(SA_i + SA_j)}{2} \quad (\text{Eq.3})$$

$SA_i$  and  $SA_j$  are the solvent accessibility of group  $i$  and  $j$  respectively, calculated as :

$$SA_i = \frac{ASA_{\text{protein}}}{ASA_{\text{tripeptide}}} \quad (\text{Eq.4})$$

$\varepsilon$  is the unit charge whose value is  $1.602 \times 10^{-19} \text{C}$

For  $A_{ij}$ :

$$A_{ij} = \frac{b}{D_i r_{ij}} \quad (\text{Eq.5})$$

Where the value of  $D_i$  is  $4\text{F/m}$ ,  $r_{ij}$  represents the distance of point  $i$  and point  $j$

For  $B_{ij}$ :

$$B_{ij} = \frac{1}{D_i} \sum_{n=0}^{\infty} \frac{(n+1)(D-D_i)}{(n+1)D+nD_i} \rho_{ij}^n p_n(\cos \theta_{ij}) \quad (\text{Eq.6})$$

Where the value of  $D$  is  $78.5 \text{ F/m}$ ,  $p_n(\cos \theta_{ij})$  represents Legendre polynomials

$$\rho_{ij}^n = \frac{r_i \times r_j}{b^2} \quad (\text{Eq.7})$$

Where  $r_i$  and  $r_j$  are the distance from  $i$  and  $j$  to the protein center respectively.

For  $C_{ij}$ :

$$C_{ij} = \frac{1}{D} \left\{ \frac{x}{1+x} + \sum_{n=1}^{\infty} \frac{2n+1}{2n-1} \left[ \frac{D}{(n+1)D+nD_i} \right]^2 \times \frac{x^2 \sigma_{ij}^n P_n(\cos \theta_{ij})}{\frac{K_{n+1}(x)}{K_{n-1}(x)} + \frac{n(D-D_i)}{(n+1)D+nD_i} \left(\frac{b}{a}\right)^{2n+1} \frac{x^2}{4n^2-1}} \right\} \quad (\text{Eq.8})$$

Where

$$\sigma_{ij} = \frac{r_i \times r_j}{a^2} \quad (\text{Eq.9})$$

$$K_n(x) = \sum_{s=0}^n \frac{2^s n! (2n-s)!}{s! (2n)! (n-s)!} x^s \quad (\text{Eq.10})$$

$$x = ka \quad (\text{Eq.11})$$

$\kappa$  is the Debye-Huckel parameters which is proportional to the square root of the ionic strength of the system:

$$\kappa^2 = \left( \frac{4\pi N \varepsilon^2}{1000 D k T} \right) \sum_i Z_i^2 C_i \quad (\text{Eq.12})$$

Where  $N$  is Avogadro whose value is  $6.02 \times 10^{23}$ ,  $k$  represents Boltzmann constant whose value is  $1.38 \text{ J/K}$ , the value of  $T, D$  and  $\varepsilon$  are  $298.15 \text{ K}$ ,  $78.5 \text{ F/m}$  and  $1.602 \times 10^{-19} \text{ C}$  respectively.

$$2I = \sum_i Z_i^2 C_i \quad (\text{Eq.13})$$

Where  $I$  is the ionic strength, the value of which is  $0.1 \text{ M}$ .

The denaturation and renaturation of protein is essentially the change of a certain conformation caused by some factors. In view of the 'two-state' theory of protein denaturation,

the protein folding in certain circumstances can be simplified into a chemical reaction:

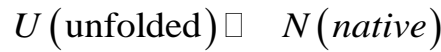

According to the Gibbs criterion, the process can automatically carry forward when the value of Gibbs function decreases; when the value is constant, it is in equilibrium; and the value increases during reverse spontaneously. Therefore, the protein stability can be studied by the change of Gibbs free energy.

$$\Delta G_{\text{qq}} = -RT \ln \left( \frac{Z_U}{Z_N} \right) \quad (\text{Eq.14})$$

Where R is gas constant whose value is 8.314472J/(K•mol), T represents absolute temperature:

$$T = t + 273.15 \quad (\text{Eq.15})$$

Where t is the ambient temperature when calculating.

$Z_N$  and  $Z_U$  represent the partition functions for the native and unfolded states, respectively.

$$Z_N = \sum_{\chi} \exp \left( -\frac{G_N(\chi)}{RT} - \nu(\chi)(\ln 10) pH \right) \quad (\text{Eq.16})$$

$$Z_U = \sum_{\chi} \exp \left( -\frac{G_U(\chi)}{RT} - \nu(\chi)(\ln 10) pH \right) \quad (\text{Eq.17})$$

Where  $\nu(\chi)$  represents the number of protonated ionizable groups in the protonation state.  $G_N(\chi)$  and  $G_U(\chi)$  are the native and unfolding protein energy respectively in a certain protonation state. It is generally considered that in unfolded state the charged amino acids of the dissociated protein do not form charge force, so as not to contribute to the protein stability.

$$G_N(\chi) = -RT(\ln 10) \sum_{i=1}^n (q_i + x_i) pK_{\text{int},i} + \frac{1}{2} \sum_{i,j=1}^n E_{ij} (q_i + x_i)(q_j + x_j)$$

(Eq.18)

$$G_U(\chi) = -RT(\ln 10) \sum_{i=1}^n (q_i + x_i) pK_{\text{int},i}$$

(Eq.19)

According to the expressions, the protein energy in native state is mainly affected by the charge interaction force between titrable points.  $q_i$  is the charge of titrable point in unprotonated state. The value of  $q_i$  is -1 when the amino acids are ASP, GLU and CTR, the value is 0 when amino acids are ARG, LYS, HIS and NTR.

$x_i$  is used to describe N protonated sites, the value is 0 when site  $i$  is not protonated, otherwise the value is 1.  $pK_{\text{int},i}$  is used to represent the intrinsic pKa value. The pKa values of ASP, LYS, GLU, ARG, HIS, N-terminal and C-terminal are 4.0, 10.6, 4.5, 12.0, 6.3, 7.7, 3.6 respectively.

$E_{ij}$  is the charge interaction between charge  $i$  and  $j$ , shown as equation Eq. 1

Therefore, when the value of  $\Delta G_{\text{qq}}$  is negative, the reaction goes to folding direction, that is the surface charge distribution plays an active role on the protein stability. The reaction goes to the reverse direction when the value is positive which means that the distribution of the surface charge has a negative effect on the protein stability.

## References

- (1) Kirkwood, J. G. *The Journal of Chemical Physics* **1934**, *2*, 351.
- (2) Tanford, C.; Kirkwood, J. G. *Journal of the American Chemical Society* **1957**, *79*, 5333.
- (3) Lee, B.; Richards, F. M. *Journal of Molecular Biology* **1971**, *55*, 379.
- (4) Matthew, J.; Hanania, G.; Gurd, F. *Biochemistry* **1979**, *18*, 1919.
- (5) Richards, F. M. *Methods in Enzymology* **1985**, *115*, 440.
- (6) Serrano, L.; Horovitz, A.; Avron, B.; Bycroft, M.; Fersht, A. R. *Biochemistry* **1990**, *29*, 9343.
- (7) Bashford, D.; Karplus, M. *The Journal of Physical Chemistry* **1991**, *95*, 9556.

- (8) Havranek, J. J.; Harbury, P. B. *Proc. Natl. Acad. Sci. U. S. A.* **1999**, *96*, 11145.
- (9) Sanchez-Ruiz, J. M.; Ibarra-Molero, B.; Loladze, V. V.; Makhatadze, G. I. *Biochemistry* **1999**, *38*, 8138.
- (10) Tsai, J.; Taylor, R.; Chothia, C.; Gerstein, M. *Journal of Molecular Biology* **1999**, *290*, 253.
- (11) Elcock, A. H. *Journal of Molecular Biology* **2001**, *312*, 885.
- (12) Sanchez-Ruiz, J. M.; Makhatadze, G. I. *Trends in biotechnology* **2001**, *19*, 132.
- (13) Ibarra-Molero, B.; Sanchez-Ruiz, J. M. *The Journal of Physical Chemistry B* **2002**, *106*, 6609.
- (14) Makhatadze, G. I.; Loladze, V. V.; Ermolenko, D. N.; Chen, X. F.; Thomas, S. T. *Journal of Molecular Biology* **2003**, *327*, 1135.
- (15) Makhatadze, G. I.; Loladze, V. V.; Gribenko, A. V.; Lopez, M. M. *Journal of Molecular Biology* **2004**, *336*, 929.
- (16) Strickler, S. S.; Gribenko, A. V.; Keiffer, T. R.; Tomlinson, J.; Reihle, T.; Loladze, V. V.; Makhatadze, G. I. *Biochemistry* **2006**, *45*, 2761.
- (17) Gribenko, A. V.; Patel, M. M.; Liu, J.; McCallum, S. A.; Wang, C. Y.; Makhatadze, G. I. *Proc. Natl. Acad. Sci. U. S. A.* **2009**, *106*, 2601.
- (18) Schweiker, K. L.; Makhatadze, G. I. *Methods Mol Biol* **2009**, *490*, 261.
